# Supplementary material for: Integrating aquatic and terrestrial biogeochemical model to predict effects of reservoir creation on CO&lt;sub&gt;2&lt;/sub&gt; emissions
Source: Copernicus journal article supplement (doi:10.5194/bg-2016-100), 2016-04-11
Supplement: Supplementary file 1 [file bg-2016-100-supplement.pdf]

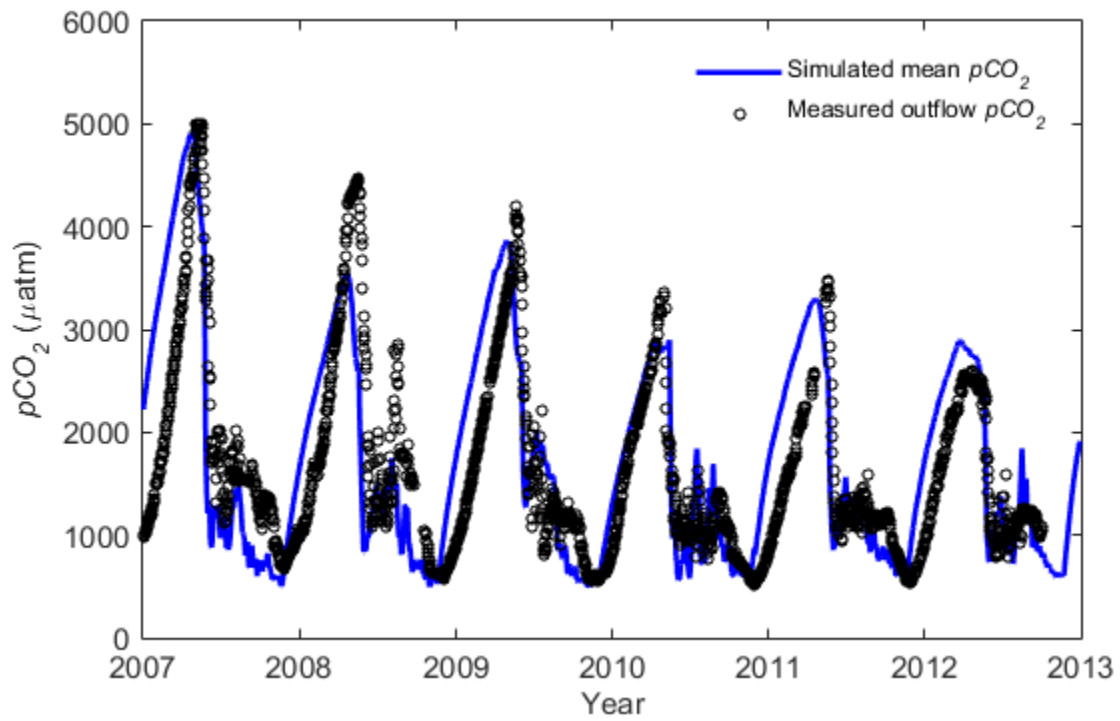

**Figure S1.** Modelled (lines) daily mean water partial pressure of  $CO_2$  ( $pCO_2$ ) and measured (cycles) daily outflow  $pCO_2$  for the Eastmain-1 reservoir from 2007 to 2012.
